# Supplementary material for: Signal, noise and skill in sub-seasonal forecasts: the role of teleconnections
Source: Copernicus journal article supplement (doi:10.5194/wcd-6-1661-2025), 2025-12-04
Supplement: Supplementary file 1 [file wcd-6-1661-2025-supplement.pdf]

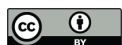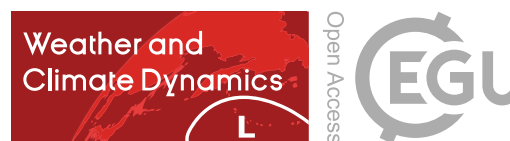

*Supplement of*

## **Signal, noise and skill in sub-seasonal forecasts: the role of teleconnections**

**Alexey Yu. Karpechko et al.**

*Correspondence to:* Alexey Yu. Karpechko (alexey.karpechko@fmi.fi)

The copyright of individual parts of the supplement might differ from the article licence.

# Signal, noise and skill in sub-seasonal forecasts: the role of teleconnections

Alexey Yu. Karpechko<sup>1</sup>, Amy H. Butler<sup>2</sup>, Frederic Vitart<sup>3</sup>

<sup>1</sup>Finnish Meteorological Institute, Helsinki, 00101, Finland

<sup>2</sup>National Oceanic and Atmospheric Administration (NOAA) Chemical Sciences Laboratory, Boulder, CO, 80305, USA

<sup>3</sup>European Centre for Medium-range Weather Forecasts, Reading, RG2 9AX, UK

Correspondence to: Alexey Yu. Karpechko (alexey.karpechko@fmi.fi)

## Supplementary Materials

**Table S1:** Spatial correlation coefficients (30°N-90°N) between the forecast skill ( $\rho$ ) and the forecast properties ( $\sigma_{EM}^2$ ,  $\sigma_{ES}^2$ ,  $STN$ ,  $\rho_{perf}^{STN}$ ,  $\rho_{perf}^{ACC}$ ) for T2M in CTRL. The values above the diagonal are for Weeks 3-4. The values below the diagonal are for Weeks 5-6.

|                     | $\rho$ | $\rho_{perf}^{STN}$ | $\rho_{perf}^{ACC}$ | $STN$ | $\sigma_{EM}^2$ | $\sigma_{ES}^2$ |
|---------------------|--------|---------------------|---------------------|-------|-----------------|-----------------|
| $\rho$              | 1      | 0.77                | 0.77                | 0.75  | -0.23           | -0.39           |
| $\rho_{perf}^{STN}$ | 0.70   | 1                   | 1                   | 0.97  | -0.21           | -0.46           |
| $\rho_{perf}^{ACC}$ | 0.69   | 1                   | 1                   | 0.96  | -0.21           | -0.46           |
| $STN$               | 0.69   | 0.97                | 0.96                | 1     | -0.21           | -0.43           |
| $\sigma_{EM}^2$     | -0.28  | -0.30               | -0.30               | -0.28 | 1               | 0.91            |
| $\sigma_{ES}^2$     | -0.45  | -0.54               | -0.55               | -0.48 | 0.90            | 1               |

**Table S2:** Spatial correlation coefficients (30°N-90°N) between the changes in the forecast skill ( $\Delta\rho$ ) and changes in the forecast properties ( $\Delta\sigma_{EM}^2$ ,  $\Delta\sigma_{ES}^2$ ,  $\Delta STN$ ,  $\Delta\rho_{perf}^{STN}$ ,  $\Delta\rho_{perf}^{ACC}$ ) for T2M in the relaxation experiments.

|           | TROP                  |                       |              |                           |                           | STRAT                 |                       |              |                           |                           |
|-----------|-----------------------|-----------------------|--------------|---------------------------|---------------------------|-----------------------|-----------------------|--------------|---------------------------|---------------------------|
|           | $\Delta\sigma_{EM}^2$ | $\Delta\sigma_{ES}^2$ | $\Delta STN$ | $\Delta\rho_{perf}^{STN}$ | $\Delta\rho_{perf}^{ACC}$ | $\Delta\sigma_{EM}^2$ | $\Delta\sigma_{ES}^2$ | $\Delta STN$ | $\Delta\rho_{perf}^{STN}$ | $\Delta\rho_{perf}^{ACC}$ |
| Weeks 1-2 | -0.03                 | -0.05                 | 0.25         | 0.42                      | 0.41                      | 0.04                  | -0.09                 | -0.03        | 0.01                      | 0.02                      |
| Weeks 3-4 | 0.10                  | -0.06                 | 0.44         | 0.51                      | 0.50                      | 0.29                  | -0.15                 | 0.16         | 0.28                      | 0.28                      |
| Weeks 5-6 | 0.03                  | -0.23                 | 0.34         | 0.36                      | 0.34                      | 0.14                  | 0.00                  | 0.08         | 0.16                      | 0.16                      |

**Table S3:** Spatial correlation coefficients (30°N-90°N) between the forecast skill ( $\rho$ ) and the forecast properties ( $\sigma_{EM}^2$ ,  $\sigma_{ES}^2$ ,  $STN$ ,  $\rho_{perf}^{STN}$ ,  $\rho_{perf}^{ACC}$ ) for TP in CTRL. The values above the diagonal are for Weeks 3-4. The values below the diagonal are for Weeks 5-6.

|                     | $\rho$ | $\rho_{perf}^{STN}$ | $\rho_{perf}^{ACC}$ | $STN$ | $\sigma_{EM}^2$ | $\sigma_{ES}^2$ |
|---------------------|--------|---------------------|---------------------|-------|-----------------|-----------------|
| $\rho$              | 1      | 0.42                | 0.41                | 0.42  | 0.23            | 0.16            |
| $\rho_{perf}^{STN}$ | 0.43   | 1                   | 1                   | 0.99  | 0.43            | 0.30            |
| $\rho_{perf}^{ACC}$ | 0.42   | 1                   | 1                   | 0.98  | 0.43            | 0.30            |
| $STN$               | 0.42   | 0.99                | 0.98                | 1     | 0.43            | 0.30            |
| $\sigma_{EM}^2$     | 0.22   | 0.46                | 0.46                | 0.45  | 1               | 0.96            |
| $\sigma_{ES}^2$     | 0.14   | 0.30                | 0.30                | 0.28  | 0.96            | 1               |

**Table S4:** Spatial correlation coefficients between the changes in the forecast skill ( $\Delta\rho$ ) and changes in the forecast properties ( $\Delta\sigma_{EM}^2$ ,  $\Delta\sigma_{ES}^2$ ,  $\Delta STN$ ,  $\Delta\rho_{perf}^{STN}$ ,  $\Delta\rho_{perf}^{ACC}$ ) for TP in the relaxation experiments.

|           | TROP                  |                       |              |                           |                           | STRAT                 |                       |              |                           |                           |
|-----------|-----------------------|-----------------------|--------------|---------------------------|---------------------------|-----------------------|-----------------------|--------------|---------------------------|---------------------------|
|           | $\Delta\sigma_{EM}^2$ | $\Delta\sigma_{ES}^2$ | $\Delta STN$ | $\Delta\rho_{perf}^{STN}$ | $\Delta\rho_{perf}^{ACC}$ | $\Delta\sigma_{EM}^2$ | $\Delta\sigma_{ES}^2$ | $\Delta STN$ | $\Delta\rho_{perf}^{STN}$ | $\Delta\rho_{perf}^{ACC}$ |
| Weeks 1-2 | 0.06                  | -0.12                 | 0.15         | 0.13                      | 0.13                      | 0.01                  | -0.03                 | 0.02         | 0.04                      | 0.04                      |
| Weeks 3-4 | 0.26                  | -0.26                 | 0.33         | 0.34                      | 0.33                      | 0.02                  | 0.02                  | 0.07         | 0.07                      | 0.07                      |
| Weeks 5-6 | 0.33                  | -0.22                 | 0.39         | 0.41                      | 0.40                      | 0.08                  | -0.08                 | 0.14         | 0.15                      | 0.15                      |

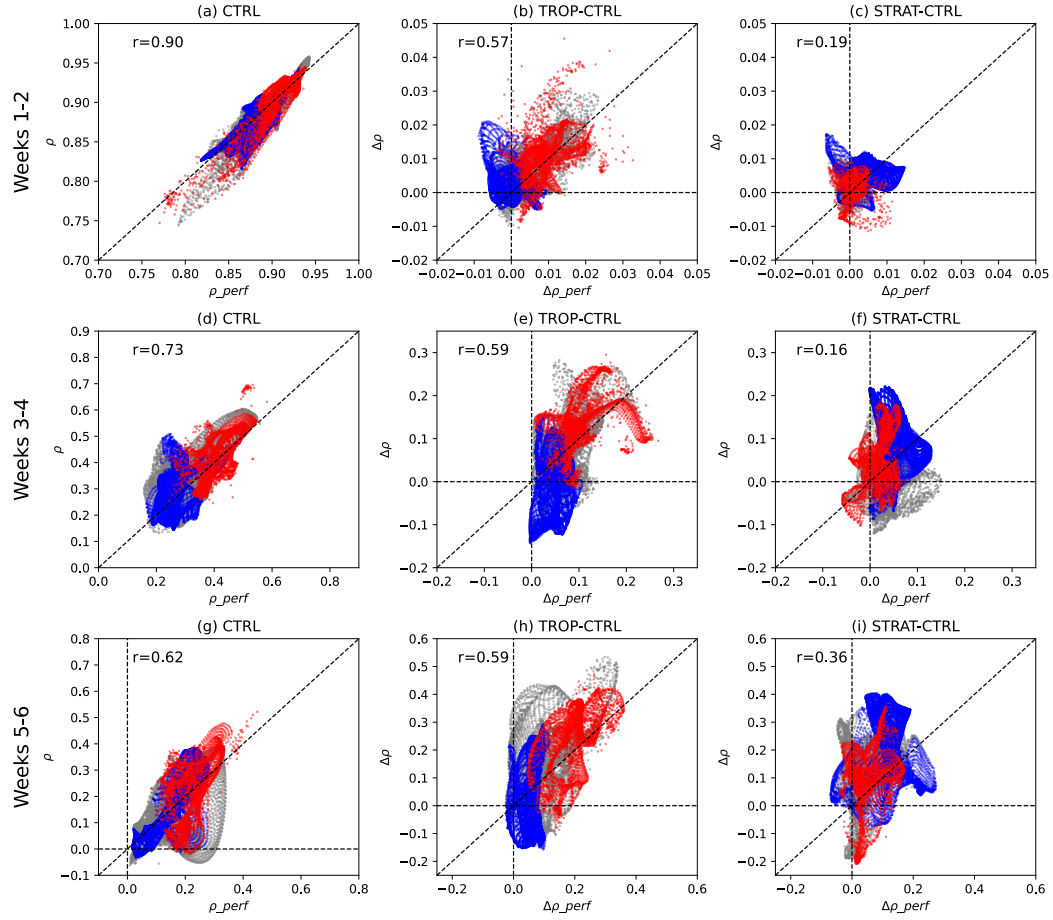

**Figure S1:** (a,d,g) Scatterplots between  $\rho$  and  $\rho_{perf}^{ACC}$  for SLP anomalies at each grid point between 30°N and 90°N in CTRL. 2nd and 3<sup>rd</sup> columns show differences for  $\rho$  and  $\rho_{perf}^{ACC}$  between relaxation experiments (TROP and STRAT respectively) and CTRL. Spatial correlation coefficients between  $\rho$  and  $\rho_{perf}^{ACC}$  fields are shown as  $r$ -values in each panel. Red dots mark grid points south of 40°N, blue dots mark grid points north of 60°N, and grey dots mark grid points between 40°N-60°N.



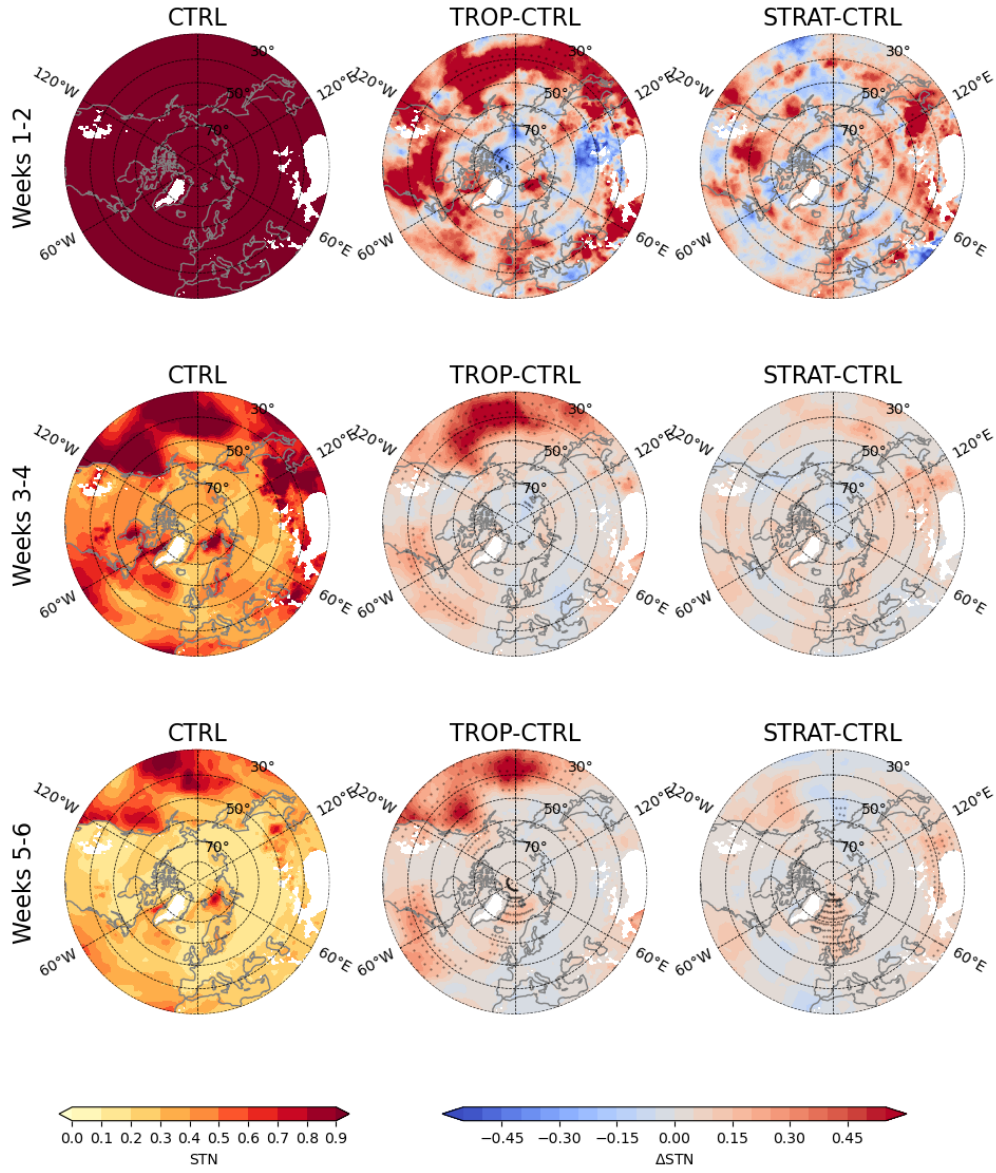

**Figure S2:** Signal to noise ratio (STN) for bi-weekly mean T2M anomalies for (left) CTRL; and the differences between  $\rho$  in (center) TROP and (right) STRAT experiments with respect to CTRL. Stippling in (center, right) indicates significant differences between CTRL and the respective relaxation experiments.

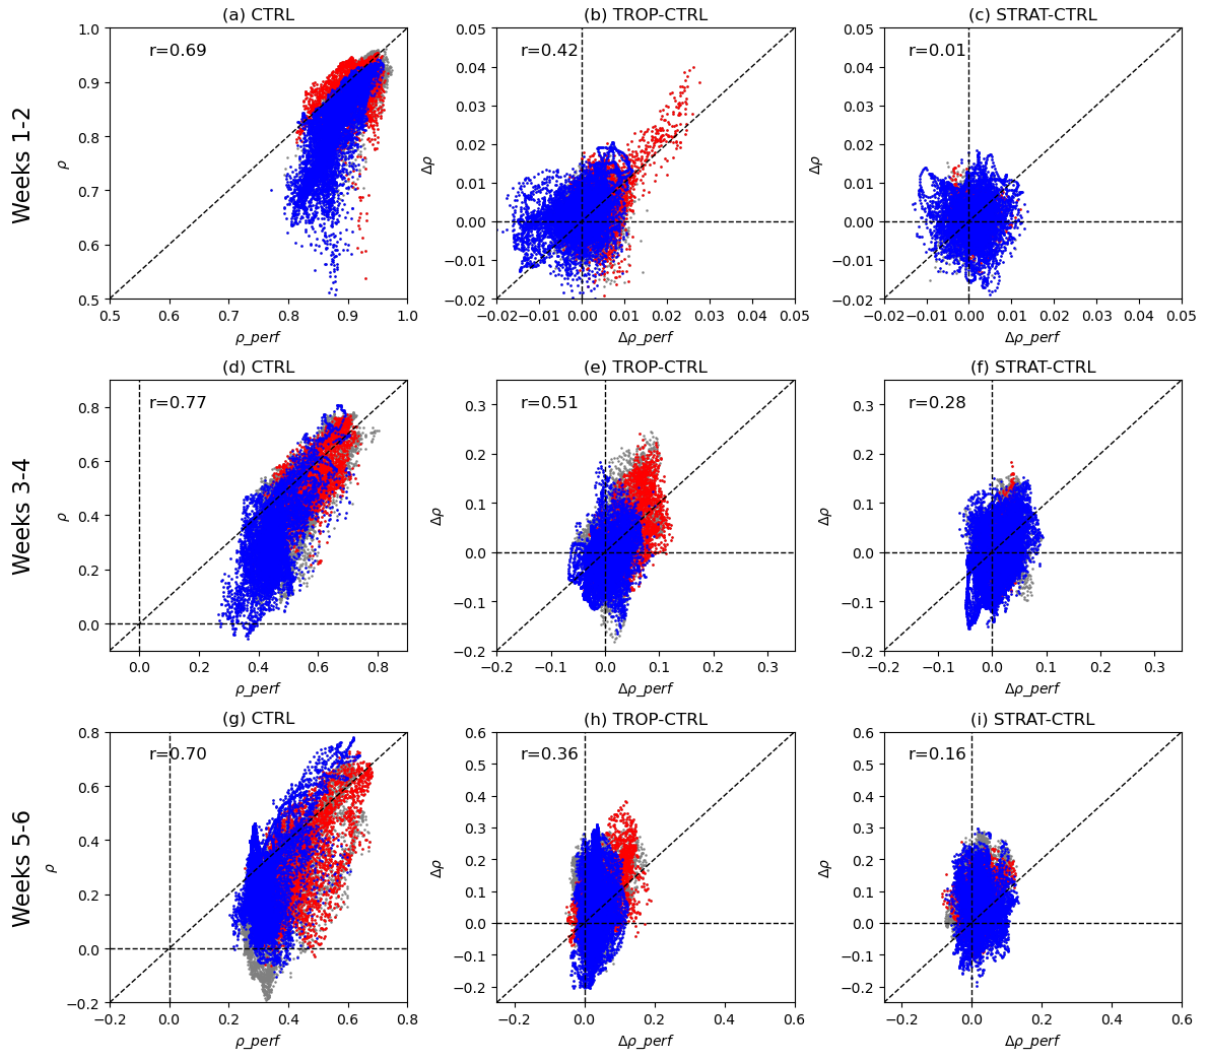

**Figure S3:** (a,d,g) Scatterplots between  $p$  and  $\Delta p_{perf}^{STN}$  for T2M anomalies at each grid point between 30°N and 90°N in CTRL. 2nd and 3rd columns show differences for  $p$  and  $\Delta p_{perf}^{STN}$  between relaxation experiments (TROP and STRAT respectively) and CTRL.  $r$ -values show spatial correlation coefficients between  $p$  and  $\Delta p_{perf}^{STN}$  fields. Red dots mark grid points south of 40°N, blue dots mark grid points north of 60°N, and grey dots mark grid points between 40°N-60°N.

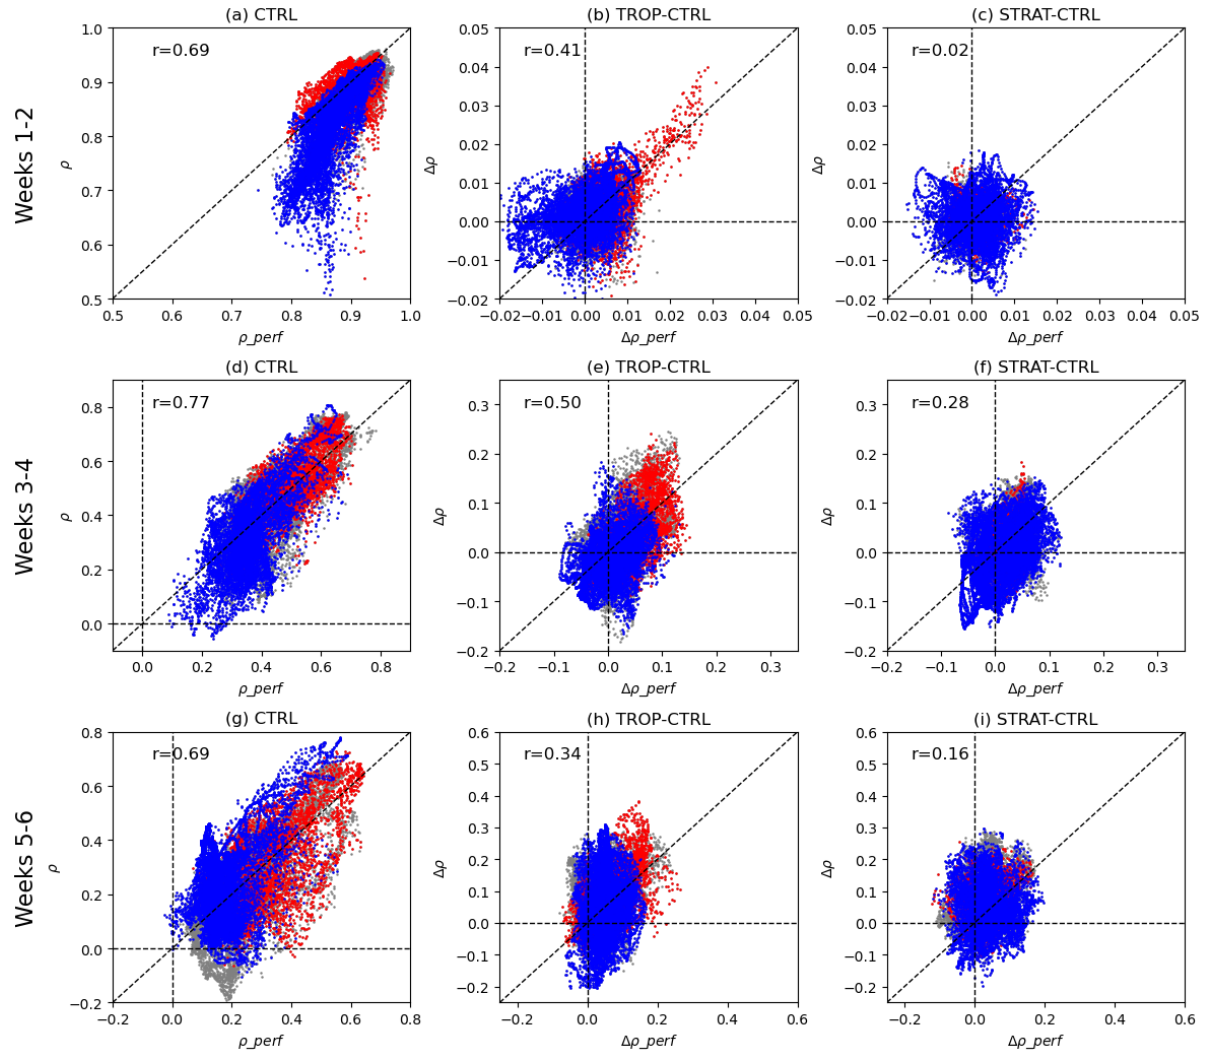

**Figure S4:** The same as Fig.S2 but for  $\rho_{perf}^{ACC}$  instead of  $\rho_{perf}^{STN}$ .

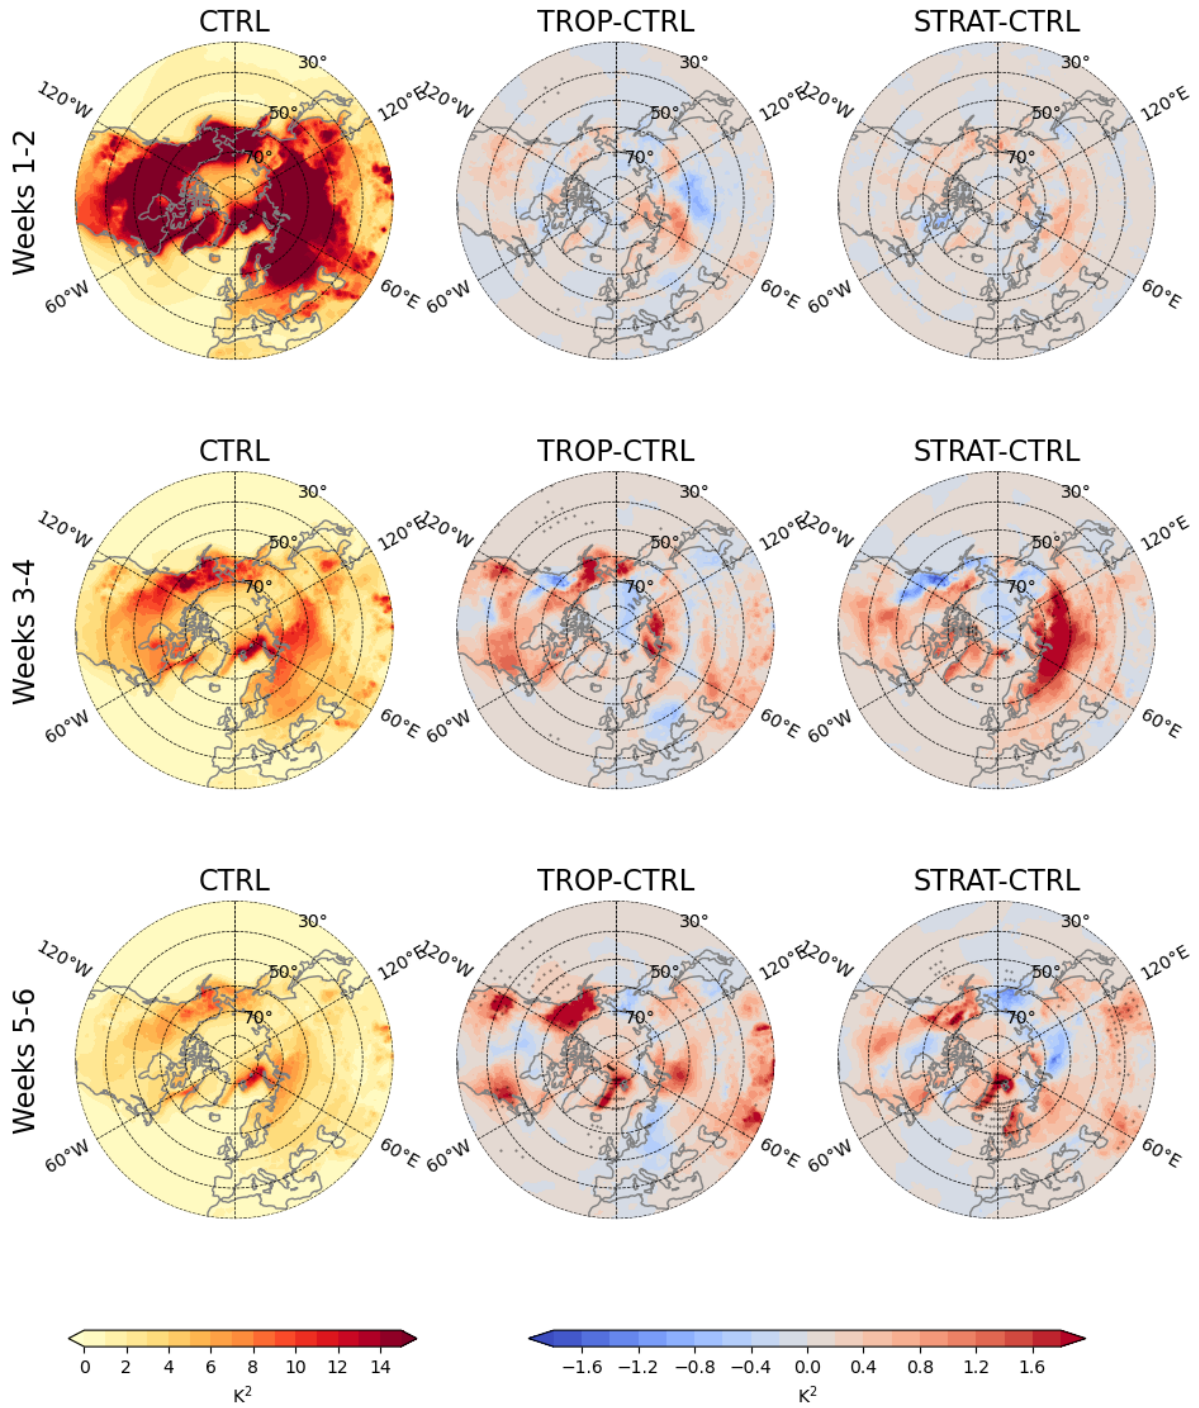

**Figure S5:** Variability of ensemble mean ( $\sigma_{EM}^2$ ) for bi-weekly mean T2M anomalies for (left) CTRL; and the differences between  $\sigma_{EM}^2$  in (center) TROP and (right) STRAT experiments with respect to CTRL. Stippling in (center, right) indicates significant differences between CTRL and the respective relaxation experiments.



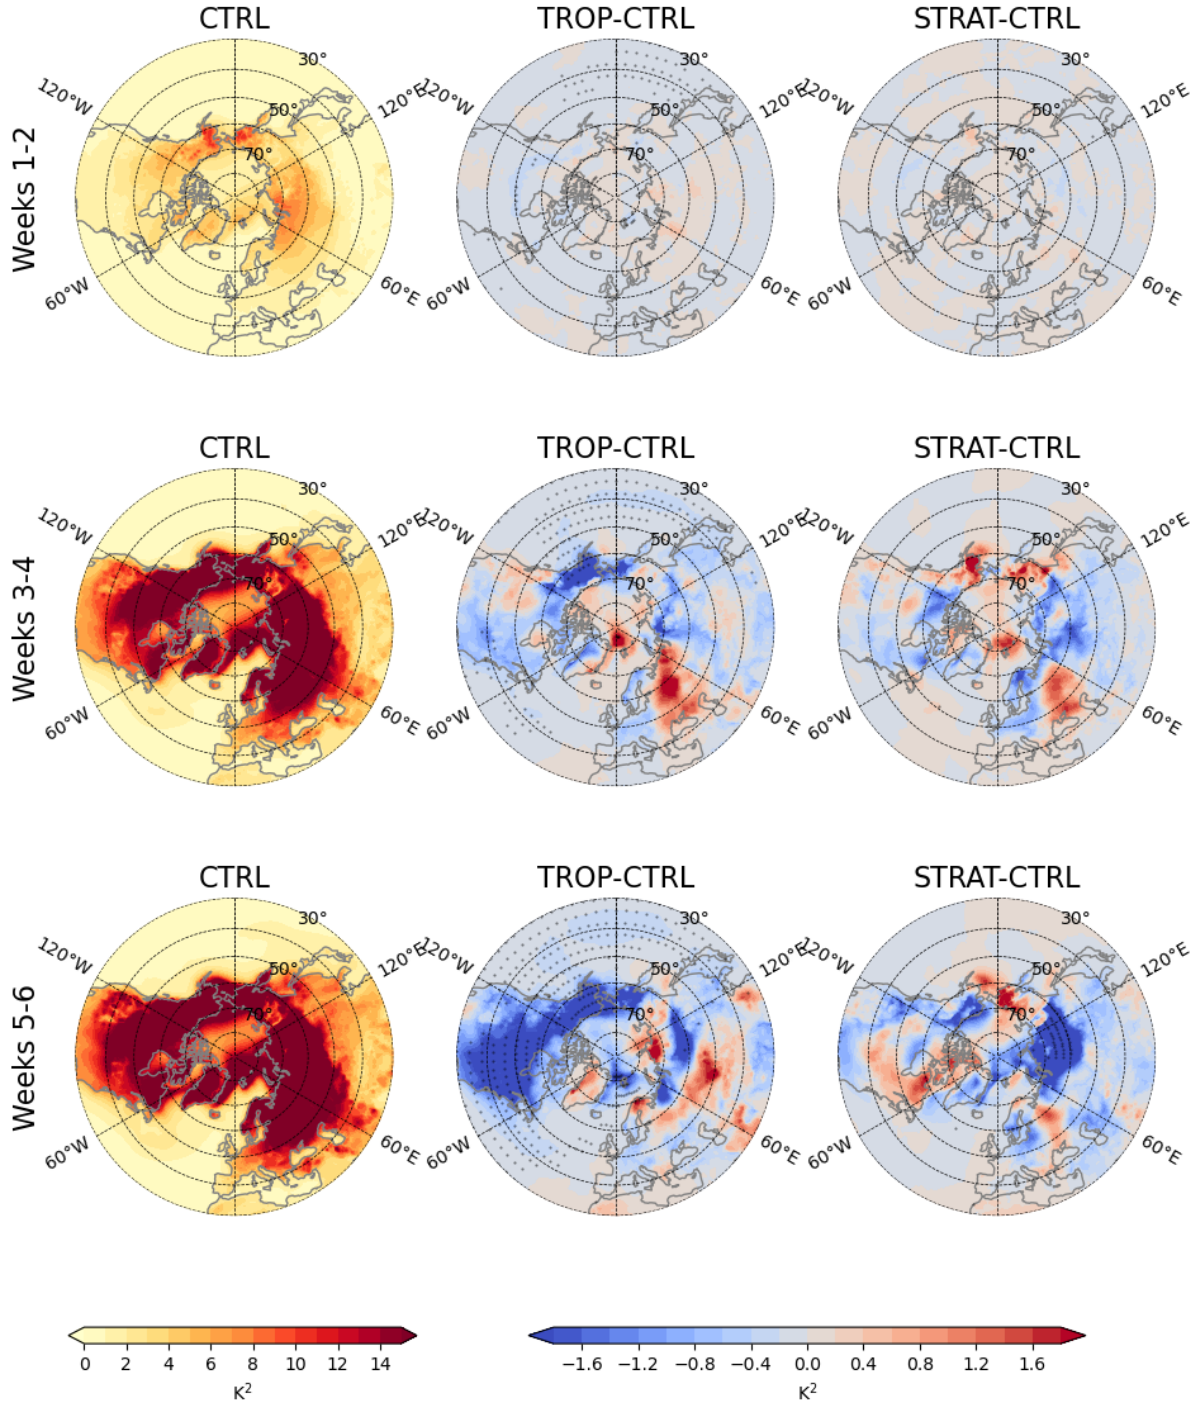

**Figure S6:** Ensemble spread ( $\sigma_{ES}^2$ ) for bi-weekly mean T2M anomalies for (left) CTRL; and the differences between  $\sigma_{ES}^2$  in (center) TROP and (right) STRAT experiments with respect to CTRL. Stippling in (center, right) indicates significant differences between CTRL and the respective relaxation experiments.

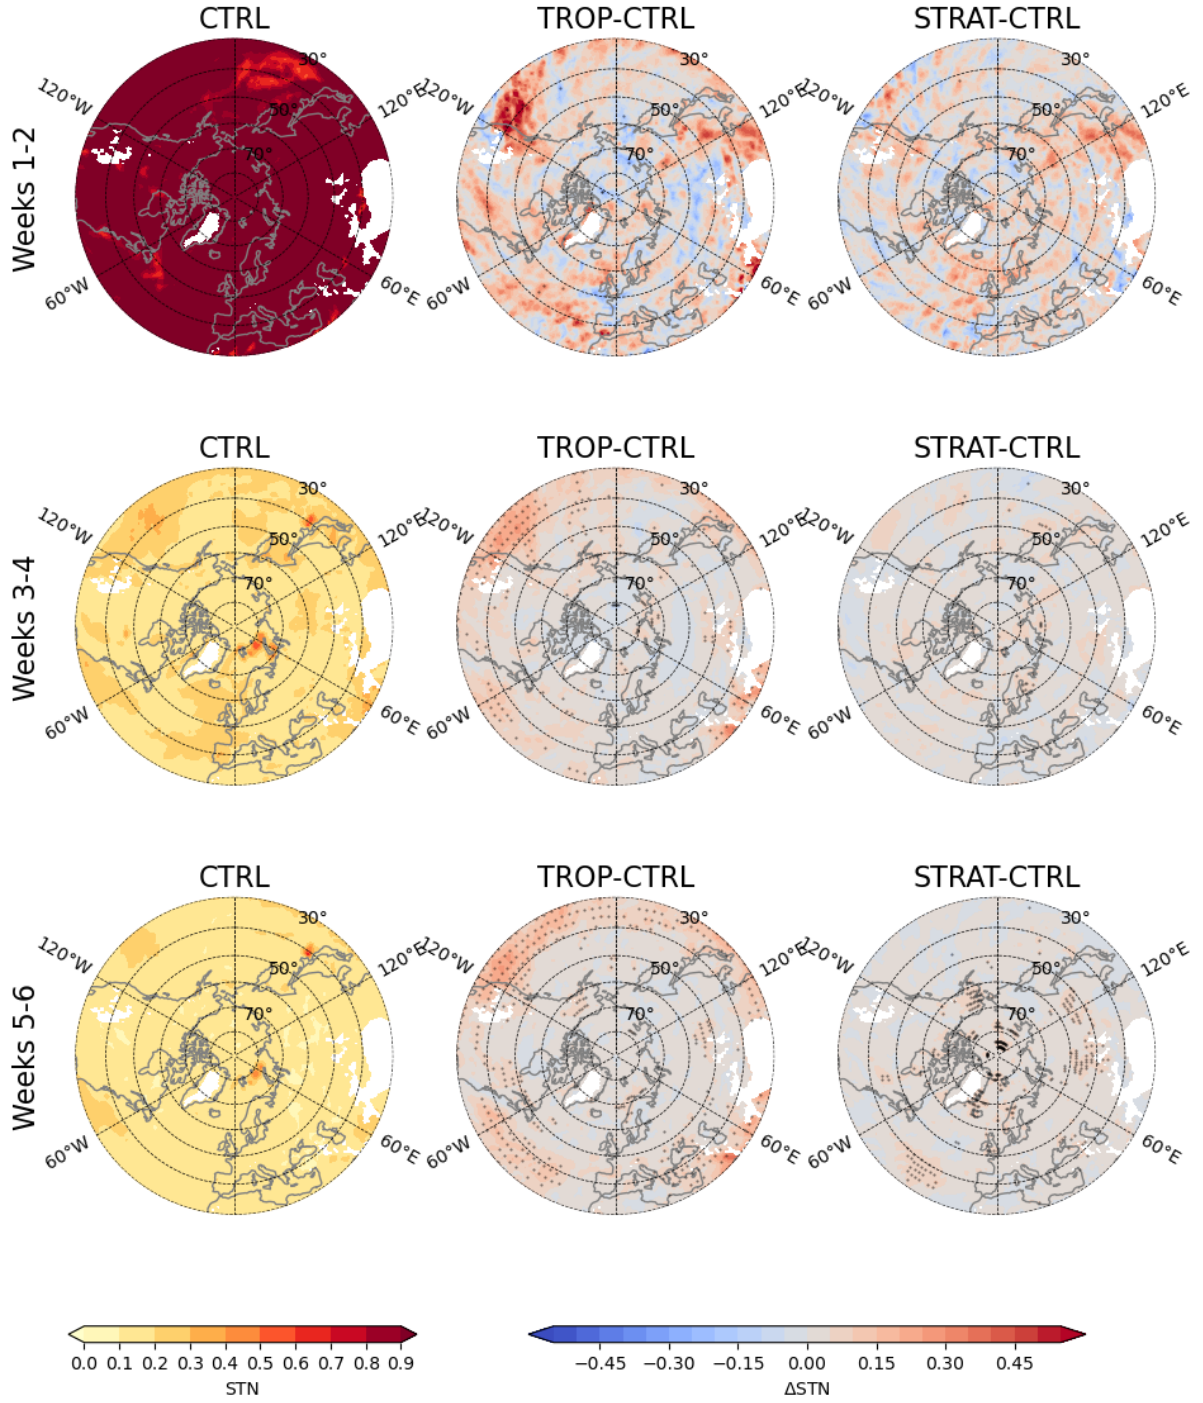

**Figure S7:** Signal to noise ratio (STN) for bi-weekly mean TP anomalies for (left) CTRL; and the differences between  $\rho$  in (center) TROP and (right) STRAT experiments with respect to CTRL. Stippling in (center, right) indicates significant differences between CTRL and the respective relaxation experiments.

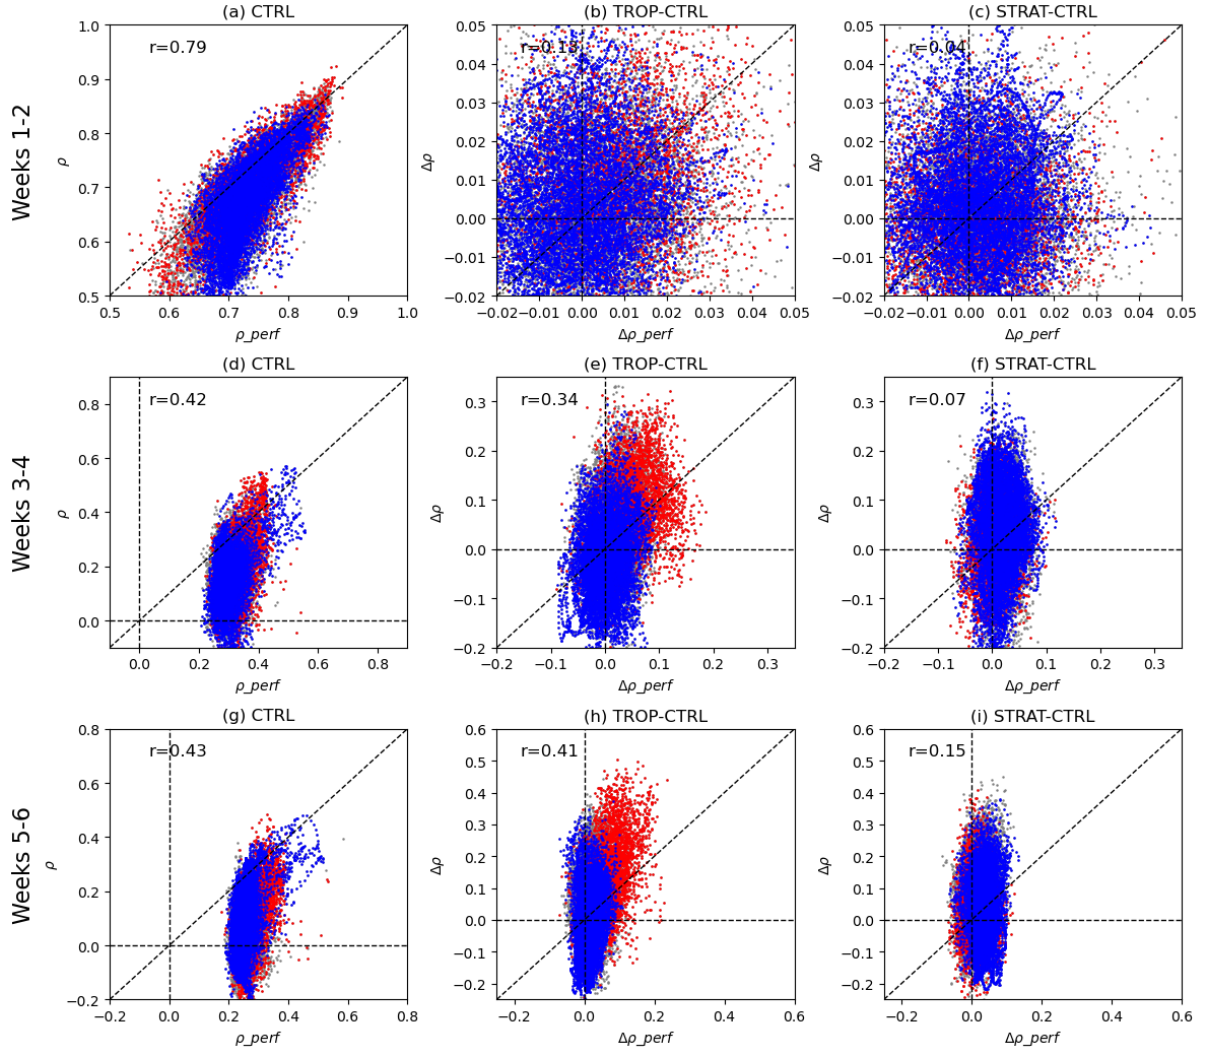

**Figure S8:** (a,d,g) Scatterplots between  $\rho$  and  $\rho_{perf}^{STN}$  for TP anomalies at each grid point between  $30^{\circ}\text{N}$  and  $90^{\circ}\text{N}$  in CTRL. 2nd and 3rd columns show differences for  $\rho$  and  $\rho_{perf}^{STN}$  between relaxation experiments (TROP and STRAT respectively) and CTRL.  $r$ -values show spatial correlation coefficients between  $\rho$  and  $\rho_{perf}^{STN}$  fields. Red dots mark grid points south of  $40^{\circ}\text{N}$ , blue dots mark grid points north of  $60^{\circ}\text{N}$ , and grey dots mark grid points between  $40^{\circ}\text{N}$ - $60^{\circ}\text{N}$ .



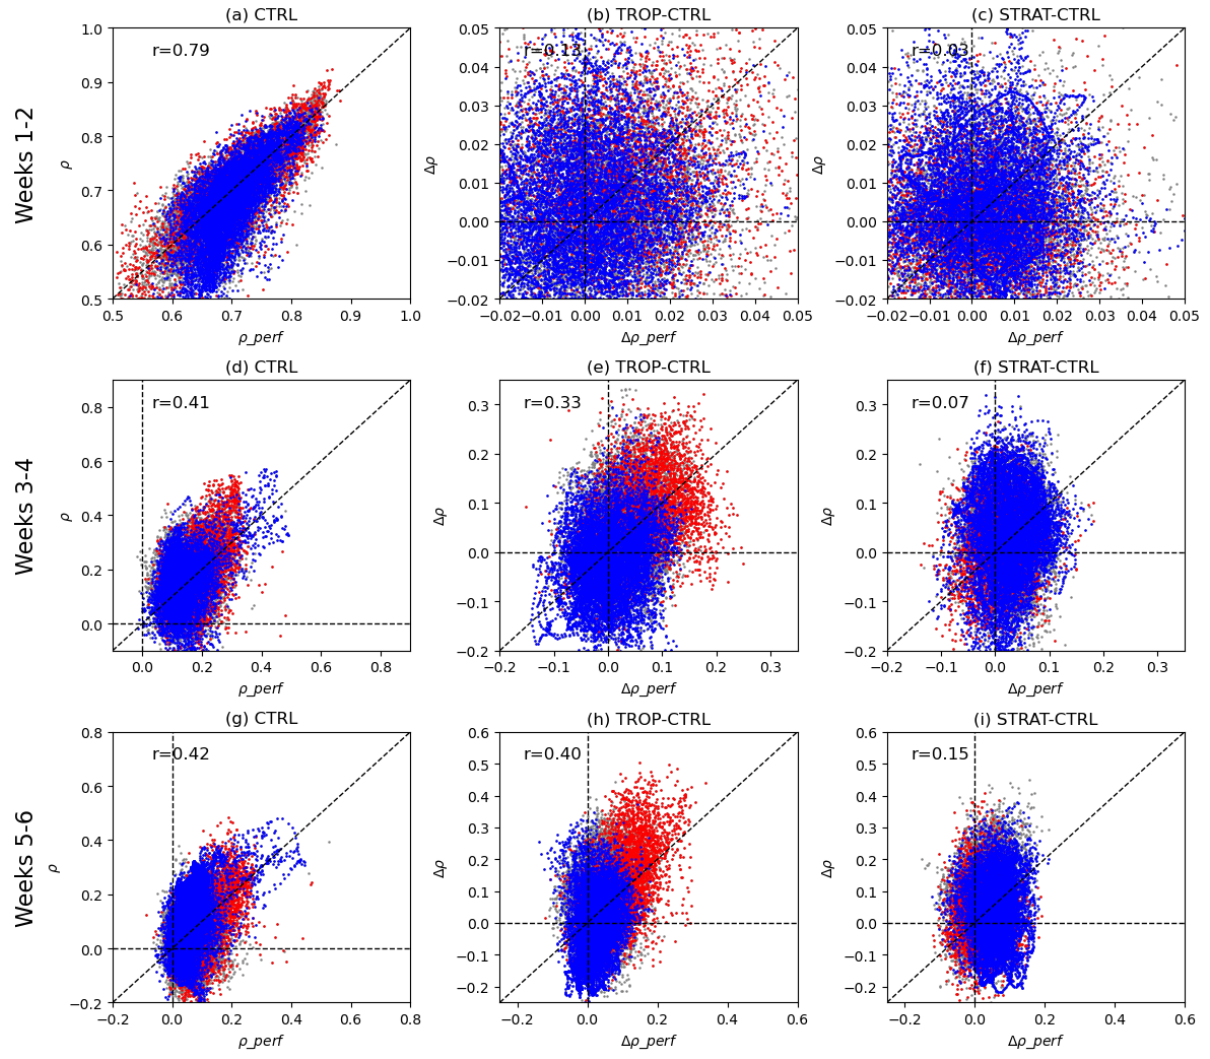

**Figure S9:** The same as Fig.S7 but for  $\rho_{perf}^{ACC}$  instead of  $\rho_{perf}^{STN}$ .



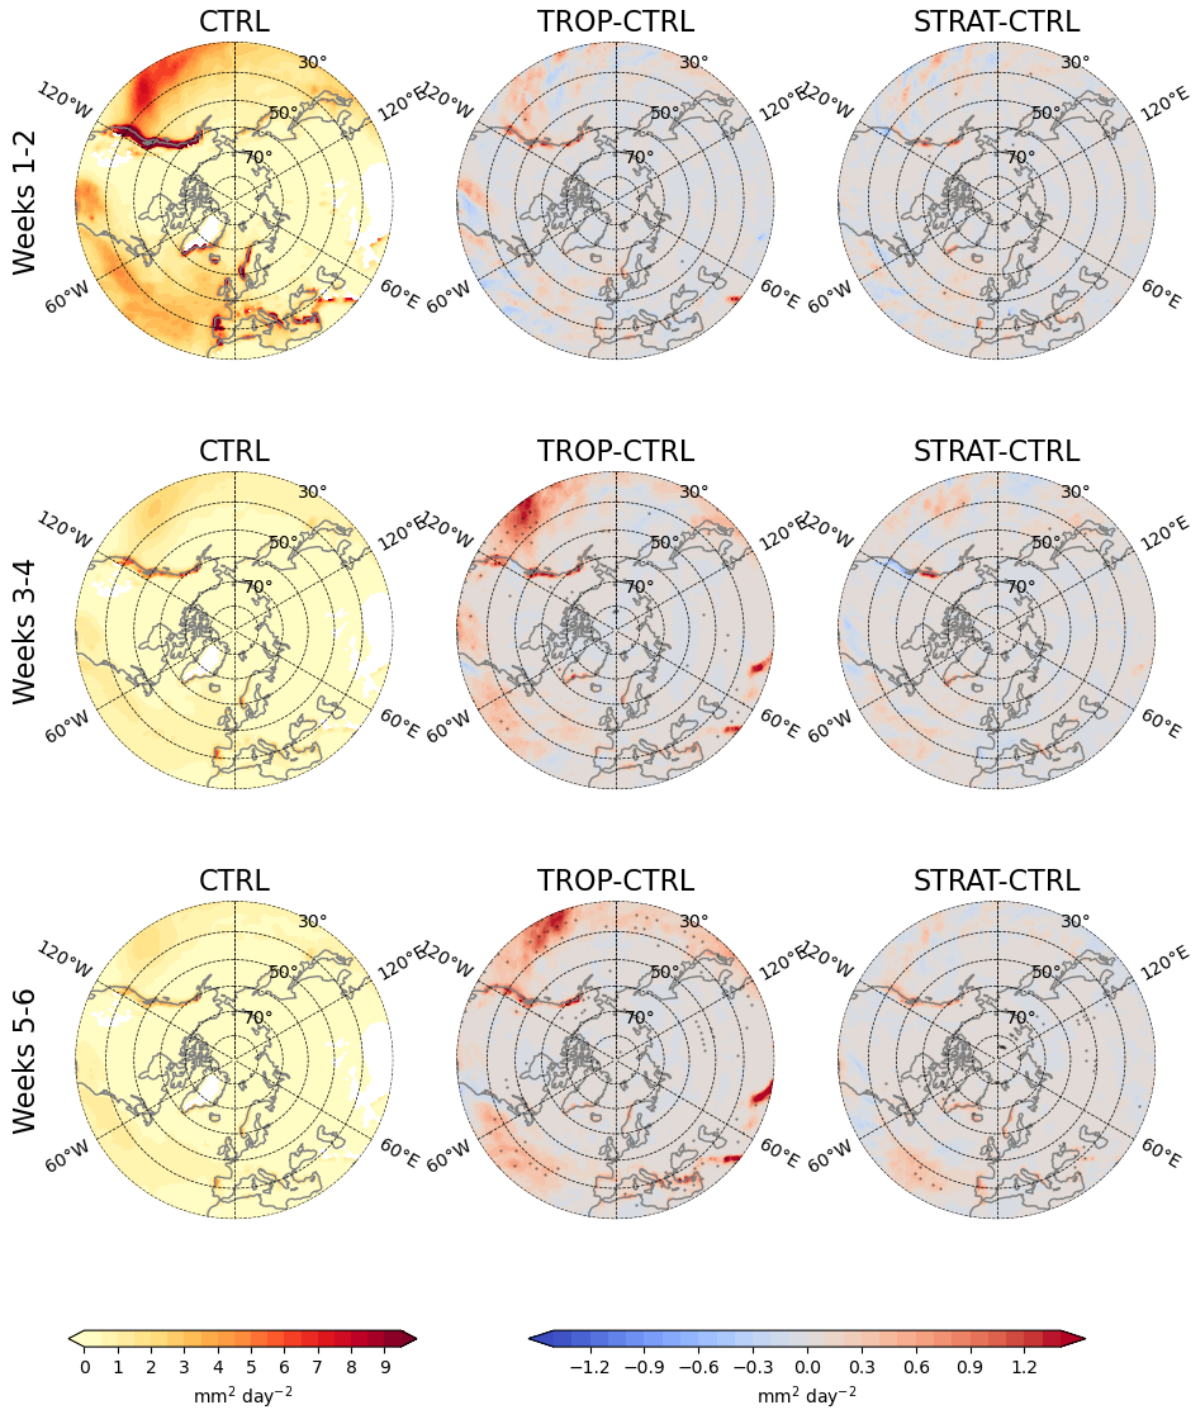

**Figure S10:** Variability of ensemble mean ( $\sigma_{EM}^2$ ) for bi-weekly mean TP anomalies for (left) CTRL; and the differences between  $\sigma_{EM}^2$  in (center) TROP and (right) STRAT experiments with respect to CTRL. Stippling in (center, right) indicates significant differences between CTRL and the respective relaxation experiments.

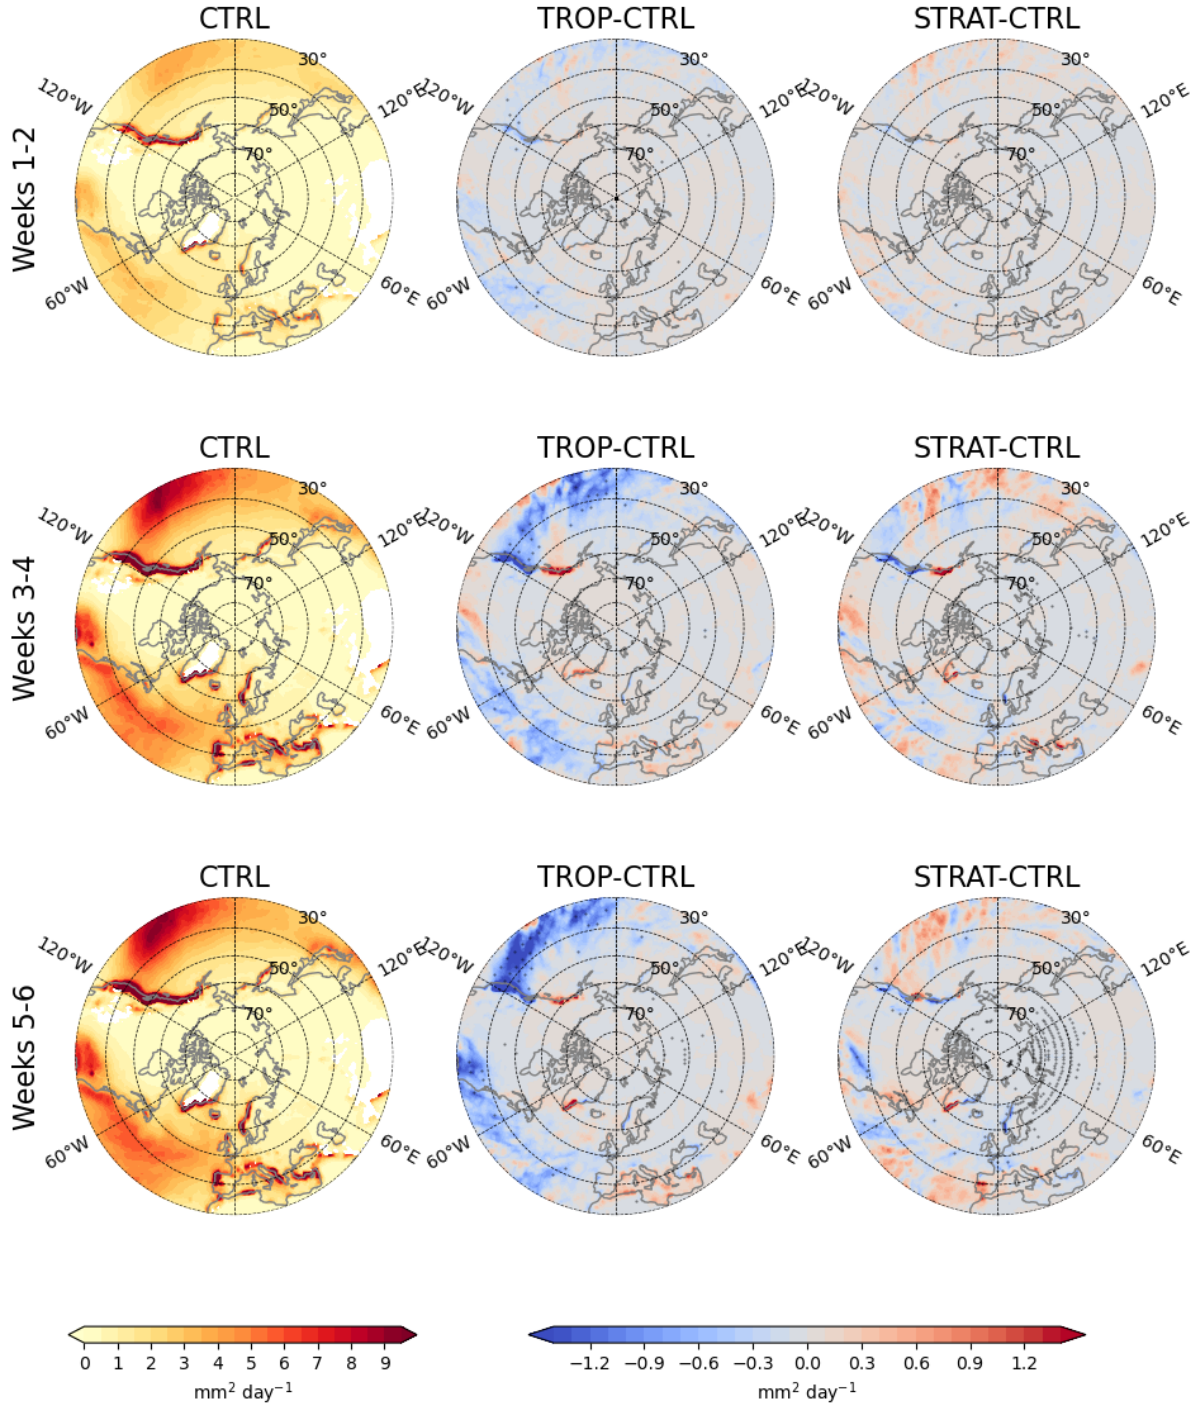

**Figure S11:** Ensemble spread ( $\sigma_{ES}^2$ ) for bi-weekly mean TP anomalies for (left) CTRL; and the differences between  $\sigma_{ES}^2$  in (center) TROP and (right) STRAT experiments with respect to CTRL. Stippling in (center, right) indicates significant differences between CTRL and the respective relaxation experiments.
